# Supplementary material for: Vibration hotspots reveal longitudinal funneling of sound-evoked motion in the mammalian cochlea
Source: PubMed Central journal article supplement (PMC6076242; doi:10.1038/s41467-018-05483-z), 2018-08-03
Supplement: 41467_2018_5483_MOESM3_ESM.pdf [file 41467_2018_5483_MOESM3_ESM.pdf]

## **Description of Additional Supplementary Files**

File Name: Supplementary Movie 1

Description: Animation of longitudinal motion in the schematized organ of Corti.
